# Supplementary material
Source: Springer Nature journal article supplement (https://www.springermedizin.de/resource/supplementary/13075_2012_3603_MOESM9_ESM.pdf/9694898)

**A**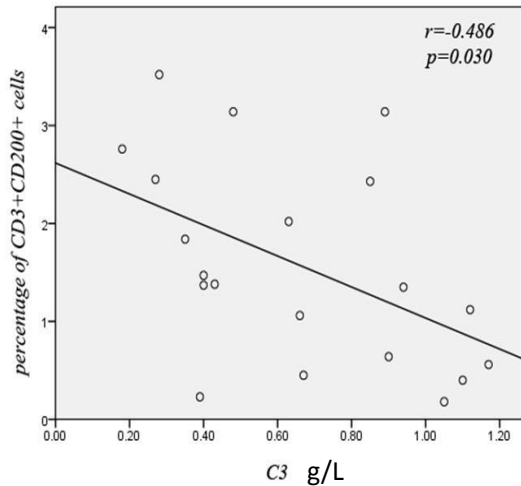**B**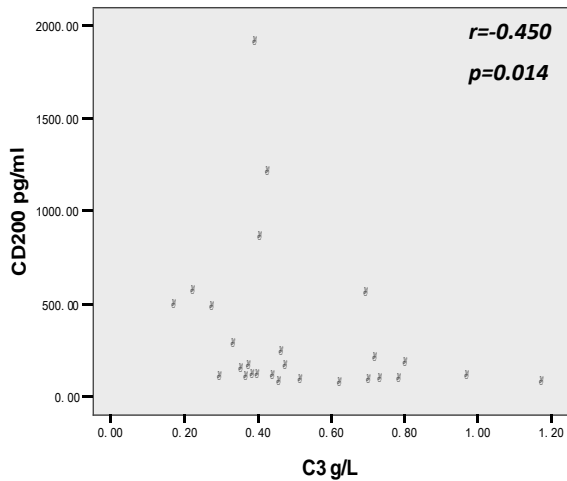

Supplement: MOESM9 [file 9694898]
